# Supplementary material for: Transporting cells over several days without dry-ice
Source: Oxford University Press journal article supplement (doi:10.1242/jcs.238139), 2019-10-02
Supplement: jcs238139supp.pdf [file jcs238139supp.pdf]

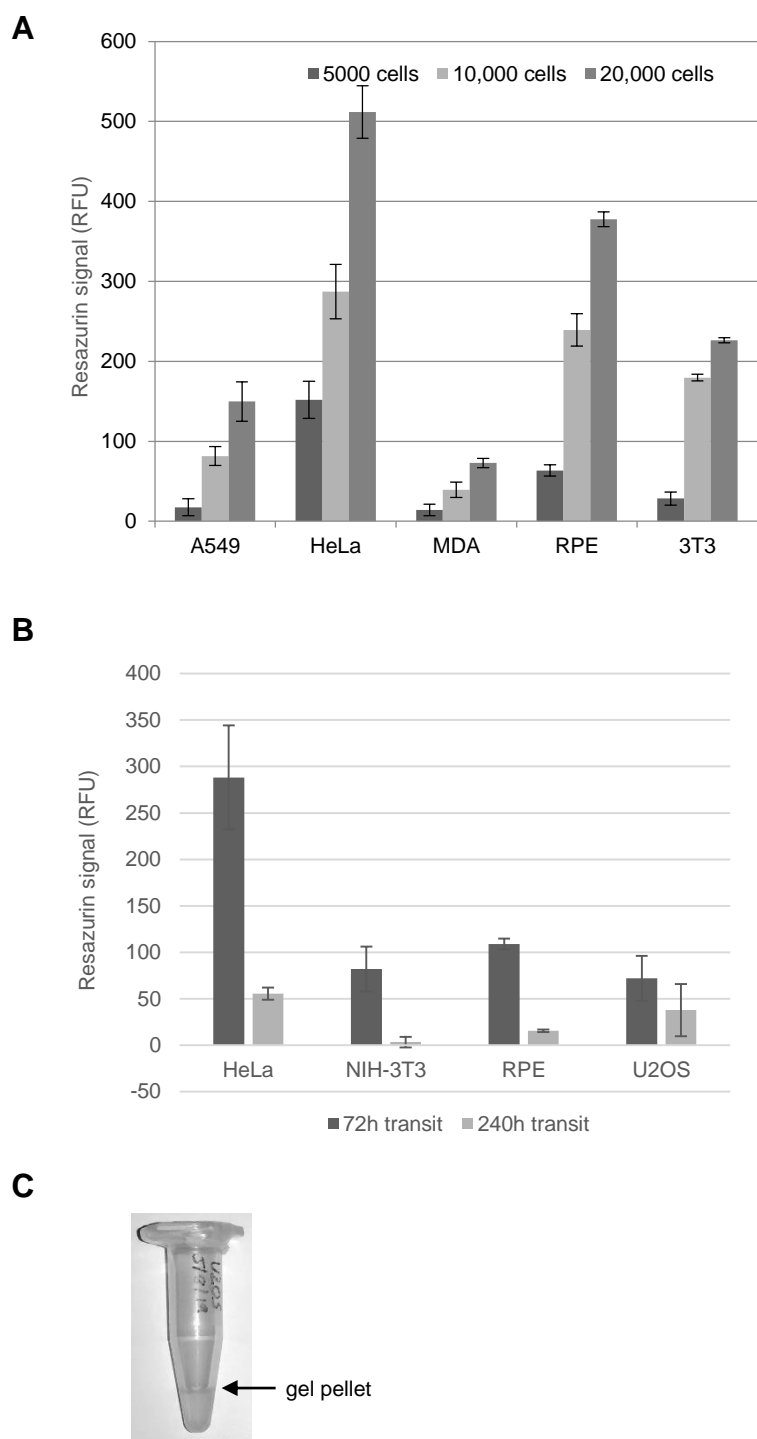

**Figure S1. Cell lines have different metabolic profiles and do not proliferate in transit. (A)** 5, 10 or 20 x 10<sup>3</sup> cells were seeded in a 96 well plate in triplicate, allowed to adhere for 4h, then a resazurin assay carried out. **(B)** Cells were seeded after 72h or 240h in transit, allowed 24h to recover then viability assessed. Cell number diminished with increased transit time suggesting loss of viability and no proliferation. **(C)** Microfuge tube containing 100  $\mu$ l cells in Transporter ready for transit.
